# Supplementary material for: Quantitative properties of a feedback circuit predict frequency-dependent pattern separation
Source: eLife. 2020 Feb 20;9:e53148. doi: 10.7554/eLife.53148 (PMC7032930; doi:10.7554/eLife.53148)
Supplement: Supplementary file 1. — Studies reporting short-term dynamics within the DG circuit were reviewed with a main focus on facilitation or depression of synaptic connections defined by pre and postsynaptic cell types. Note the abundance of depressing synapses (quantitative descriptions of depression blue). Also note the complexity of direct connections between Interneurons (lower third of the table). [file elife-53148-supp1.xlsx]

## Sheet: Tabelle1
	From	To	IN location	Method	Freq.	short term dynamics	pulses	species	Authors
GC to IN	GC	BC	GC-border	dual patch	50 Hz	PPD	2	juv. wistar rats	Geiger and Jonas (1997)
	GC	BC	not stated	dual patch	20 & 50Hz	depression	10 & 5	C57/BL6 mice	Espinoza et al. (2019)
	GC	SST	not stated	dual patch	20Hz	facilitation	10	C57/BL6 mice	Espinoza et al. (2019)
e-stim to IN	PP & C/A	FS	GC-border	e-stim/ spike prob.	50 Hz	decreased spike prob.	10	juv. SD rats	Liu et al. (2014)	q
	PP	FS	GC-border	e-stim	10 Hz	depression to 53%	20	juv. C57/BL6 mice	Ewell and Jones (2010)	q
	PP & C/A	non-FS	GC-border	e-stim/ spike prob.	50 Hz	increased spike prob.	10	juv. SD rats	Liu et al. (2014)	q
	PP & MF	FS	GC-border	e-stim	30 Hz	facilitation	25	juv. wistar rats	Sambandan et al. (2010)
	MF	FS	GC-border	e-stim (close)	30 Hz	PPF ~160%	2	juv. wistar rats	Dasgupta et al (2015)
e-stim to MC	MF	MC	Hilus	e-stim	20 Hz	facilitation to 500 - 700%	5	juv. wistar rat	Lysetskiy (2005)	q
IN to GC	BC	GC	GC-border	dual patch	10 & 50 Hz	PPD ~60%	2	juv. wistar rats	Kraushaar and Jonas (2000)	q
						depression to ~25% & 0%	> 850
	PV	GC	GC-border	dual patch	50 Hz	depression to 19%	10	juv. wistar rats	Hefft and Jonas (2005)	q
	CCK	GC	GC-border	dual patch	50 Hz	depression to 20%	10	juv. wistar rats	Hefft and Jonas (2005)	q
	SST	GC	Hilus	dual patch	50 Hz	depression to 20%	20	adult GIN mice	Zhang et al. (2009)	q
	BC	GC	GC-border	dual patch	20 Hz	PPD to 39%	2	juv. C57/BL6 mice	Bartos et al. (2002)	q
	FS	GC	GC-border	dual patch	10 Hz	PPD to 85%	2	juv. SD rats	Harney and Jones (2002)	q
	non-FS	GC	GC-border	dual patch	10 Hz	PPD to 77 %	2	juv. SD rats	Harney and Jones (2002)	q
	PP	GC	GC-border	e-stim	10 Hz	depression to 40%	20	juv. C57/BL6 mice	Ewell and Jones (2010)	q
	CB1-R	GC	GC-border	dual patch	25 Hz	depression to 73%	5	juv. SD rats	Liu et al. (2014)	q
	HICAP	GC	GC-border	dual patch	25 Hz	depression to 68%	5	juv. SD rats	Liu et al. (2014)	q
	HIPP	GC	GC-border	dual patch	25 Hz	depression to 65%	5	juv. SD rats	Liu et al. (2014)	q
	PV	GC	GC-border	dual patch	25 Hz	depression to 44%	5	juv. SD rats	Liu et al. (2014)	q
	CCK	GC	not stated	dual patch	20Hz	depression	10	C57/BL6 mice	Espinoza et al. (2019)
IN to IN	BC	BC	GC-border	dual patch	50 Hz	depression to 50%	10	juv. wistar rats	Savanthrapadian et al. (2014)	q
	HICAP	HICAP	GC-border	dual patch	50 Hz	facilitation to 160%	10	juv. wistar rats	Savanthrapadian et al. (2014)	q
	HIPP	HIPP	GC-border	dual patch	50 Hz	facilitative envelope	10	juv. wistar rats	Savanthrapadian et al. (2014)	q
	HICAP	BC	GC-border	dual patch	50 Hz	no change	10	juv. wistar rats	Savanthrapadian et al. (2014)	q
	HIPP	BC	GC-border	dual patch	50 Hz	no change	10	juv. wistar rats	Savanthrapadian et al. (2014)	q
	BC	BC	GC-border	dual patch	20 Hz	PPD to 26%	2	juv. C57/BL6 mice	Bartos et al. (2002)	q
	TML (non-FS)	TML	GC-border	dual patch	50 Hz	PPF to ~220%	8	adult wistar rats	Yu et al. (2015)
	non-FS	non-FS	GC-border	dual patch	25Hz	no change 110%	5	juv. SD rats	Liu et al. 2014	q
	FS	non-FS	GC-border	dual patch	25Hz	depression to 54%	5	juv. SD rats	Liu et al. 2014	q
	FS	FS	GC-border	dual patch	25Hz	depression to 0.5%	5	juv. SD rats	Liu et al. 2014	q
	IN	IN	Hilus	dual patch	17 Hz	PPD to ~89%	2	juv. SD rats	Larimer and Strowbridge (2008)	q
MC	IN	MC	Hilus	dual patch	17 Hz	PPD to ~89%	2	juv. SD rats	Larimer and Strowbridge (2008)	q
	MC	IN	Hilus	dual patch	17 Hz	no change (129%)	2	juv. SD rats	Larimer and Strowbridge (2008)
		cells					other
		BC	basket cell				blue	depression, quantitatively described
		CCK	cholecystokinin expressing cell				green	facilitation, quantitatively described
		FS	fast spiking cell (> 50Hz peak firing frequency)				PPD	paired pulse depression
		GC	granule cell				PPF	paired pulse facilitation
		HICAP	hilar commissural/associational path associated cell				e-stim	extracellular electrical stimulation
		HIPP	hilar perforanth path associated cell				C/A	commissural/ associational electrical stimulation
		IN	not further categorized interneuron				MF	mossy fi_x001E_ber
		MC	mossy cell				PP	perforant path
		non- FS	non- FS (< 50Hz peak firing frequency)				SD rat	spraque dawley rat
		SST	somatostatin expressing cell				juv.	juvenile (12 to 25 days postnatally)
		TML	total molecular layer cell				q	quantitatively described
							~	estimate based on graph
