# Supplementary material for: Quantitative properties of a feedback circuit predict frequency-dependent pattern separation
Source: eLife. 2020 Feb 20;9:e53148. doi: 10.7554/eLife.53148 (PMC7032930; doi:10.7554/eLife.53148)
Supplement: Supplementary file 2. — Overview of synaptic and intrinsic parameters between model cell-types. First row includes modeled cell number per type. PP: perforant path, GC: granule cell, MC: mossy cell, BC: basket cell, HC: Hilar perforant path associated cell; Weight: maximal synaptic conductance, Facilitation Max.: maximal fold increase of synaptic conductance, Decay Tau: synaptic decay time constant, Facilit. Tau: facilitation time constant, Delay: latency to postsynaptic event after presynaptic action potential, Target pool: range of n closest cells potentially receiving an output, Divergence: number of output synapses per cell stochastically picked from target pool, Target segments: cellular compartment receiving the synapse. Values in brackets are values for robustness analyses in Figs. S10, S11. [file elife-53148-supp2.xlsx]

## Sheet: Sheet1
		To
		GC, 2000	MC, 60	BC, 24	HC, 24
From	PP
	Weight (nS)	1 (0.6 - 2)	/	1 (0.6 - 2)	/
	Decay Tau (ms)	10		6.3
	Facilit. Tau (ms)	0		0
	Delay (ms)	0		0
	Target Pool	2000		24
	Divergence	100 GC/PP		1 BC/PP
	Target Segments	mid. dendrite		distal dendrite
	GC
	Weight (nS)	/	2	2.5	2.5
	Facilitation Max.		10x	10x	10x
	Decay Tau (ms)		7.6	8.7	8.7
	Facilit. Tau (ms)		500	500	500
	Delay (ms)		1.5	0.8	1.5
	Target Pool		12	8	24
	Divergence		1:1	1:1	1:1
	Target Segments		prox. dendrite	prox. dendrite	prox. dendrite
	MC
	Weight (nS)	/	0.5	0.3	0.2
	Decay Tau (ms)		2.2	2	6.2
	Facilit. Tau (ms)		0	0	0
	Delay (ms)		2	3	3
	Target Pool		24	12	20
	Divergence		1:3	1:1	1:2
	Target Segments		prox. dendrite	prox. dendrite	mid. dendrite
	BC
	Weight (nS)	1.2 (2.4, 0.6, 0.24)	1.5	7.6	/
	Decay Tau (ms)	20 (10, 40, 100)	3.3	1.8
	Facilit. Tau (ms)	0	0	0
	Delay (ms)	0.85	1.5	0.8
	Target Pool	560	28	12
	Divergence	1:400	1:3	1:2
	Target Segments	soma	prox. dendrite	prox. dendrite
	HC
	Weight (nS)	6 (12, 3, 1.2)	1.5	0.5	/
	Decay Tau (ms)	20 (10, 40, 100)	6	5.8
	Facilit. Tau (ms)	0	0	0
	Delay (ms)	3.8	1	1.6
	Target Pool	2000	60	24
	Divergence	1:640	1:4	1:4
	Target Segments	distal dendrite	mid dendrite	distal dendrite
